# Supplementary material
Source: PubMed Central journal article supplement (PMC7091658)
Supplement: 41436_2018_48_MOESM3_ESM.pdf [file 41436_2018_48_MOESM3_ESM.pdf]

## Table S2: Aminoacylation activity of mutated ARSs

Table S2a. Patient mutations and associated aminoacylation activity (% of wild type activity)

| Gene        | Mutation     | Activity                    | Comment                                                                                     | Reference |
|-------------|--------------|-----------------------------|---------------------------------------------------------------------------------------------|-----------|
| <b>AARS</b> | p.Lys81Thr   | ± 54%                       | Steady-state yeast aminoacylation assays                                                    | 31        |
|             | p.Arg751Gly  | ± 8%                        |                                                                                             |           |
| <b>DARS</b> | p.Asp367Tyr  | “min. 3                     | Mutations in C-terminal domain;<br>refers to (Cavarelli <i>et al.</i> , 1994)<br>reduction” | 41        |
|             | p.Ala274Val  | fold                        |                                                                                             |           |
|             | p.Met256Leu  |                             |                                                                                             |           |
|             | p.Arg487Cys  |                             |                                                                                             |           |
|             | p.Arg460His  |                             |                                                                                             |           |
|             | p.Arg494Gly  |                             |                                                                                             |           |
|             | p.Pro464Leu  |                             |                                                                                             |           |
|             | p.Arg494Cys  |                             |                                                                                             |           |
| <b>GARS</b> | p.Ser635Leu  | NA                          |                                                                                             | 48        |
|             | p.Arg596Gln  | NA                          |                                                                                             |           |
|             | p.Thr268Ile  | NA                          |                                                                                             | 49        |
|             | p.Arg412Cys  | NA                          |                                                                                             |           |
| <b>HARS</b> | p.Tyr454Ser  | NA                          |                                                                                             | 42        |
| <b>IARS</b> | p.Arg418*    | “LoF” ±                     | Tet-Off yeast model: observed density<br>(note: ≠ aminoacylation activity...)               | 36        |
|             |              | 41%                         |                                                                                             |           |
|             | p.Arg254*    | “LoF” ±                     |                                                                                             |           |
|             |              | 39%                         |                                                                                             |           |
|             | p.Asn992Asp  | ± 57%                       |                                                                                             |           |
|             | p.Ile1174Asn | ± 65%                       |                                                                                             |           |
|             | p.Pro437Leu  | ± 58%                       |                                                                                             |           |
|             | p.Val370Gly  | ± 86%                       |                                                                                             |           |
| p.Arg739Cys | “LoF”        | Yeast complementation assay | 37                                                                                          |           |
| p.Phe556Ser | “Impaired”   |                             |                                                                                             |           |

|             |                             |            |                                                      |       |
|-------------|-----------------------------|------------|------------------------------------------------------|-------|
| <b>KARS</b> | p.Tyr173His                 | NA         |                                                      | 51    |
|             | p.Asp377Asn                 | NA         |                                                      |       |
|             | p.Arg438Trp                 | NA         |                                                      | 52    |
|             | p.Glu525Lys                 | NA         |                                                      |       |
|             | p.Leu350His                 | NA         |                                                      | 53    |
|             | p.Pro390Arg                 | NA         |                                                      |       |
| <b>LARS</b> | p.Lys82Arg                  | NA         |                                                      | 29,30 |
|             | p.Tyr373Cys                 | NA         |                                                      |       |
|             | p.Ala504Val                 | NA         |                                                      |       |
|             | p.Asn614Lys                 | NA         |                                                      |       |
| <b>MARS</b> | p.Phe370Leu                 | ± 18%      | In HEK293 cells                                      | 33    |
|             | p.Ile523Thr                 | ± 16%      |                                                      |       |
|             | p.Ser567Leu                 | ± 40%      | Aminoacylation activity in MARS yeast ortholog       | 34    |
|             | p.Ala393Thr                 | ± 90% (NS) | Mes1 variants                                        |       |
|             | p.Asp605Val                 | ± 58%      |                                                      |       |
|             | p.Tyr344Cys                 | ± 60%      |                                                      |       |
|             | p.Asp145Asn                 | NA         |                                                      | 35    |
|             | p.Phe802Ser                 | NA         |                                                      |       |
| <b>RARS</b> | p.Asp2Gly                   | NA         |                                                      | 40    |
|             | Splice error<br>(c.45+1G>T) | NA         |                                                      |       |
|             | p.Asp2Gly                   | NA         |                                                      |       |
|             | p.Cys32TrpfsX39             | NA         |                                                      |       |
|             | p.Met1?                     | NA         |                                                      |       |
|             | p.Arg512Gln                 | NA         |                                                      |       |
| <b>SARS</b> | p.Asp172Asn                 | 49%        | After 90 min.; GST-SARS in HEK293 cells              | 43    |
| <b>QARS</b> | p.Tyr57His                  | ± 72%      | In lymphoblast cell lines with 1 mutant allele and 1 | 44    |
|             | p.Arg515Trp                 | ± 63%      | WT allele                                            |       |

|             |              |       |                        |    |
|-------------|--------------|-------|------------------------|----|
|             | p.Gly45Val   | ± 38% |                        |    |
|             | p.Tyr57His   | NA    |                        | 45 |
|             | p.Lys496*    | NA    |                        |    |
|             | p.Val476Ile  | 33%   | In patient fibroblasts | 46 |
| <b>VARS</b> | p.Leu885Phe  | NA    |                        | 39 |
|             | p.Arg1058Gln | NA    |                        |    |
| <b>YARS</b> | p.Pro213Leu  | NA    |                        | 38 |
|             | p.Gly525Arg  | NA    |                        |    |

Table S2b. Aminoacylation activity in patients (when available; % of wild type activity)

| Gene        | Mutations             | N | Allele 1      | Allele 2      | Activity | Comment                                             | Reference           |
|-------------|-----------------------|---|---------------|---------------|----------|-----------------------------------------------------|---------------------|
| <b>AARS</b> | Compound heterozygous | 2 | p.Lys81Thr    | p.Arg751Gly   | ± 31%    | Steady-state yeast aminoacylation                   | 31                  |
|             | Homozygous            | 1 | p.Arg751Gly   | p.Arg751Gly   | ± 8%     | assay                                               |                     |
| <b>IARS</b> | Compound heterozygous | 2 | p.Trp435Cys   | p.Asn1126fs   | 33%      | In patient fibroblasts                              | <i>This article</i> |
| <b>MARS</b> | Compound heterozygous | 1 | p.Phe370Leu   | p.Ile523Thr   | ± 17%    | In HEK293 cells                                     | 33                  |
|             | Homozygous            | 2 | p.Ser567Leu   | p.Ser567Leu   | ± 25%    | Aminoacylation activity in MARS yeast ortholog Mes1 | 34                  |
|             | Homozygous            | 6 | & p.Ala393Thr | & p.Ala393Thr |          | variants                                            |                     |
| <b>SARS</b> | Homozygous            | 4 | p.Asp172Asn   | p.Asp172Asn   | 49%      | After 90 min; GST-SARS in HEK293 cells              | 43                  |
| <b>QARS</b> | Compound heterozygous | 2 | p.Gly45Val    | p.Arg403Trp   | ± 35 %   | In patient lymphoblast cell lines                   | 44                  |
|             | Compound heterozygous | 2 | p.Tyr57His    | p.Arg515Trp   | ± 35 %   |                                                     |                     |

---

|            |   |             |             |     |                        |    |
|------------|---|-------------|-------------|-----|------------------------|----|
| Homozygous | 3 | p.Val476Ile | p.Val476Ile | 33% | In patient fibroblasts | 46 |
|------------|---|-------------|-------------|-----|------------------------|----|

---
